# Supplementary material for: Chemistry, mechanism and clinical status of antisense oligonucleotides and duplex RNAs
Source: PubMed Central journal article supplement — Nucleic Acids Res. 2017 Dec 12;46(4):1584–600. doi: 10.1093/nar/gkx1239 (PMC5829639; doi:10.1093/nar/gkx1239), 2017-12-12
Supplement: gkx1239_supp.pdf [file gkx1239_supp.pdf]

**Supplementary Data.** Reference/Source of the design and chemistry of oligonucleotide drugs mentioned in this review.

| Name                     | Reference/Source                                                                                                                                                                                                                                                                                                                                                                                                                                                                                                                                                       |
|--------------------------|------------------------------------------------------------------------------------------------------------------------------------------------------------------------------------------------------------------------------------------------------------------------------------------------------------------------------------------------------------------------------------------------------------------------------------------------------------------------------------------------------------------------------------------------------------------------|
| Formivirsen (Vitravene)  | Mulamba, G.B., Hu, A., Azad, R.F., Anderson, K.P. and Coen, D.M., 1998. Human cytomegalovirus mutant with sequence-dependent resistance to the phosphorothioate oligonucleotide fomivirsen (ISIS 2922). <i>Antimicrobial agents and chemotherapy</i> , 42(4), pp.971-973.                                                                                                                                                                                                                                                                                              |
| Pegaptanib (Macugen)     | Ng, E.W., Shima, D.T., Calias, P., Cunningham, E.T., Guyer, D.R. and Adamis, A.P., 2006. Pegaptanib, a targeted anti-VEGF aptamer for ocular vascular disease. <i>Nature reviews drug discovery</i> , 5(2), pp.123-132.                                                                                                                                                                                                                                                                                                                                                |
| Oblimersen (Genesense)   | Rom, J., Von Minckwitz, G., Eiermann, W., Sievert, M., Schlehe, B., Marme, F., Schuetz, F., Scharf, A., Eichbaum, M., Sinn, H.P. and Kaufmann, M., 2008. Oblimersen combined with docetaxel, adriamycin and cyclophosphamide as neo-adjuvant systemic treatment in primary breast cancer: final results of a multicentric phase I study. <i>Annals of oncology</i> , 19(10), pp.1698-1705.                                                                                                                                                                             |
| GRN-163L (Imetelstat)    | Jackson, S.R., Zhu, C.H., Paulson, V., Watkins, L., Dikmen, Z.G., Gryaznov, S.M., Wright, W.E. and Shay, J.W., 2007. Antiadhesive effects of GRN163L—an oligonucleotide N3'→ P5' thio-phosphoramidate targeting telomerase. <i>Cancer research</i> , 67(3), pp.1121-1129.                                                                                                                                                                                                                                                                                              |
| Mipomersen (Kynamro)     | Geary, R.S., Baker, B.F. and Crooke, S.T., 2015. Clinical and preclinical pharmacokinetics and pharmacodynamics of mipomersen (Kynamro®): a second-generation antisense oligonucleotide inhibitor of apolipoprotein B. <i>Clinical pharmacokinetics</i> , 54(2), pp.133-146.                                                                                                                                                                                                                                                                                           |
| Inotersen                | Inotersen is also called "ISIS 420915" (ISIS-TTR <sub>Rx</sub> )<br>Rosie, Z.Y., Grundy, J.S., Henry, S.P., Kim, T.W., Norris, D.A., Burkey, J., Wang, Y., Vick, A. and Geary, R.S., 2015. Predictive dose-based estimation of systemic exposure multiples in mouse and monkey relative to human for antisense oligonucleotides with 2'-O-(2-methoxyethyl) modifications. <i>Molecular Therapy-Nucleic Acids</i> , 4, p.e218.                                                                                                                                          |
| Ionis-HTT <sub>Rx</sub>  | Ionis-HTT <sub>Rx</sub> is also called "ISIS-443139", which is on page 34 in the patent "MODULATION OF HUNTINGTIN EXPRESSION"                                                                                                                                                                                                                                                                                                                                                                                                                                          |
| Volanesorsen             | <a href="http://www.who.int/medicines/publications/druginformation/innlists/RL75.pdf">http://www.who.int/medicines/publications/druginformation/innlists/RL75.pdf</a> & <a href="https://en.wikipedia.org/wiki/Volanesorsen">https://en.wikipedia.org/wiki/Volanesorsen</a>                                                                                                                                                                                                                                                                                            |
| Drisapersen              | <a href="https://chem.nlm.nih.gov/chemidplus/rn/1181666-20-5">https://chem.nlm.nih.gov/chemidplus/rn/1181666-20-5</a> & <a href="https://pubchem.ncbi.nlm.nih.gov/compound/121494117#section=Depositor-Supplied-Synonyms">https://pubchem.ncbi.nlm.nih.gov/compound/121494117#section=Depositor-Supplied-Synonyms</a>                                                                                                                                                                                                                                                  |
| Eterplirsen (Exondys 51) | <a href="https://www.accessdata.fda.gov/drugsatfda_docs/label/2016/206488lbl.pdf">https://www.accessdata.fda.gov/drugsatfda_docs/label/2016/206488lbl.pdf</a> & <a href="https://en.wikipedia.org/wiki/Eteplirsen">https://en.wikipedia.org/wiki/Eteplirsen</a>                                                                                                                                                                                                                                                                                                        |
| Miravirsen               | <a href="https://en.wikipedia.org/wiki/Miravirsen">https://en.wikipedia.org/wiki/Miravirsen</a> & <a href="https://chem.nlm.nih.gov/chemidplus/rn/1072874-90-8">https://chem.nlm.nih.gov/chemidplus/rn/1072874-90-8</a>                                                                                                                                                                                                                                                                                                                                                |
| Nusinersen (Spinraza)    | <a href="http://www.ema.europa.eu/docs/en_GB/document_library/EPAR_-_Public_assessment_report/human/004312/WC500229706.pdf">http://www.ema.europa.eu/docs/en_GB/document_library/EPAR_-_Public_assessment_report/human/004312/WC500229706.pdf</a> & <a href="https://www.accessdata.fda.gov/drugsatfda_docs/label/2016/209531lbl.pdf">https://www.accessdata.fda.gov/drugsatfda_docs/label/2016/209531lbl.pdf</a>                                                                                                                                                      |
| Patisiran                | Patisiran is ALN-18328, <a href="https://www.google.com/patents/WO2016033326A2?cl=en">https://www.google.com/patents/WO2016033326A2?cl=en</a> & <a href="https://chem.nlm.nih.gov/chemidplus/rn/1420706-45-1">https://chem.nlm.nih.gov/chemidplus/rn/1420706-45-1</a>                                                                                                                                                                                                                                                                                                  |
| Inclisiran               | Khvorova, A. (2017). Oligonucleotide therapeutics—a new class of cholesterol-lowering drugs. <i>N Engl J Med</i> , 376(1), 4-7.                                                                                                                                                                                                                                                                                                                                                                                                                                        |
| RG-012                   | No public information available                                                                                                                                                                                                                                                                                                                                                                                                                                                                                                                                        |
| Revusiran                | Revusiran is ALN-TTR <sub>sc</sub> , Fitusiran is ALN-AT3, Givosiran is ALN-AS1, no exact structure and sequence publically available, the best chemistry sketch is from <a href="http://www.alnylam.com/web/assets/ALNY-ESC-GalNAC-siRNA-TIDES-May2014-Capella.pdf">http://www.alnylam.com/web/assets/ALNY-ESC-GalNAC-siRNA-TIDES-May2014-Capella.pdf</a> and <a href="http://www.alnylam.com/wp-content/uploads/2017/08/RNAi-Platform-RoundTable_FINAL20170823.pdf">http://www.alnylam.com/wp-content/uploads/2017/08/RNAi-Platform-RoundTable_FINAL20170823.pdf</a> |
| Fitusiran                |                                                                                                                                                                                                                                                                                                                                                                                                                                                                                                                                                                        |
| Givosiran                |                                                                                                                                                                                                                                                                                                                                                                                                                                                                                                                                                                        |
